# Supplementary material for: Distinct cardiac energy metabolism and oxidative stress adaptations between obese and non-obese type 2 diabetes mellitus
Source: PubMed Central journal article supplement (PMC7052888; doi:10.7150/thno.40735), 2020-02-03
Supplement: thnov10p2675s1.pdf [file thnov10p2675s1.pdf]

## Supplementary Material

1

### 2 Supplementary Figure Legends

3 **Figure S1. Identification of T2DM mice model with obesity or non-obesity.** (A) Roadmap of mouse  
4 model building (T2DM with obesity). (B) Growth curve of T2DM mice with obesity. (n = 10-30) (C)  
5 Blood glucose of T2DM mice with obesity. (n = 10-30) (D) Serum insulin content of T2DM mice with  
6 obesity. (n = 6) (E) HOMO-IR of T2DM mice with obesity. (n = 6) (F) ITT of T2DM mice with obesity  
7 in the 4th week of the disease course. (n = 6) (G) Roadmap of mouse model building (T2DM with  
8 non-obesity). (H) Growth curve of T2DM mice with non-obesity. (n = 9-50) (I) Blood glucose of  
9 T2DM mice with non-obesity. (n = 9-38) (J) Serum insulin content of T2DM mice with non-obesity. (n  
10 = 6) (K) HOMO-IR of T2DM mice with non-obesity. (n = 6) (L) GTT of T2DM mice with non-obesity  
11 in the 4th week of the disease course. (n = 6) (M) ITT of T2DM mice with non-obesity in the 24th  
12 week of the disease course. (n = 6) (N) HE staining of islet tissues in the 24th and 36th week of the  
13 disease course (Scale bar = 50  $\mu$ m). Data are expressed as mean  $\pm$  SD. (\*,  $p < 0.05$ ; \*\*,  $p < 0.01$ ; \*\*\*,  
14  $p < 0.001$ ).

15

16 **Figure S2. The heart rate and cardiac diastolic function of obese and non-obese T2DM mice.** (A)  
17 Heart rate of obese mice in the 24th week of the disease course. (B) Mitral valve rheography of obese  
18 mice in the 24th week of the disease course. (C) E/A ratio of obese mice in the 24th week of the disease  
19 course. (D) Aortic ejection time of obese mice in the 24th week of the disease course. (E) Isovolumetric  
20 contraction time of obese mice in the 24th week of the disease course. (F) Isovolumic relaxation time  
21 of obese mice in the 24th week of the disease course. (G) Heart rate of non-obese mice in the 36th  
22 week of the disease course before and after anesthesia. (H) Mitral valve rheography of non-obese mice  
23 in the 24th and 36th week of the disease course. (I) E/A ratio of non-obese mice in the 24th and 36th  
24 week of the disease course. (J) Aortic ejection time of non-obese mice in the 24th and 36th week of the  
25 disease course. (K) Isovolumetric contraction time of non-obese mice in the 24th and 36th week of the  
26 disease course. (L) Isovolumic relaxation time of non-obese mice in the 24th and 36th week of the  
27 disease course. Data are expressed as mean  $\pm$  SD. (\*,  $p < 0.05$ ; \*\*,  $p < 0.01$ ; \*\*\*,  $p < 0.001$ . n = 6-10  
28 for each group).

29

30 **Figure S3. Serum lipids of obese and non-obese T2DM mice.** (A) Serum FFAs content of obese  
31 T2DM mice. (B) Serum TG content of obese T2DM mice. (C) Serum TC content of obese T2DM mice.  
32 (D) Serum LDL content of obese T2DM mice. (E) Serum HDL content of obese T2DM mice. (F)  
33 Serum FFAs content of non-obese T2DM mice. (G) Serum TG content of non-obese T2DM mice. (H)  
34 Serum TC content of non-obese T2DM mice. (I) Serum LDL content of non-obese T2DM mice. (J)  
35 Serum HDL content of non-obese T2DM mice. Data are expressed as mean  $\pm$  SD. (\*,  $p < 0.05$ ; \*\*,  
36  $p < 0.01$ ; \*\*\*,  $p < 0.001$ . n = 6 for each group).

37

38 **Figure S4. Western blot results of proteins related to insulin resistance and glycogen synthesis in**  
39 **heart tissues from T2DM mice.** (A) Western blot images of proteins related to Akt pathway in hearts  
40 tissues from obese T2DM mice. (B) Relative quantification based on the panel A. (C) Western blot  
41 images of proteins related to Akt pathway in hearts tissues from non-obese T2DM mice. (D) Relative  
42 quantification based on the panel C. Data are expressed as mean  $\pm$  SD. (\*,  $p < 0.05$ ; \*\*,  $p < 0.01$ ; \*\*\*,  
43  $p < 0.001$ . n = 3 for each group)

44  
45  
46  
47  
48  
49  
50  
51  
52  
53  
54  
55  
56  
57  
58  
59  
60  
61  
62  
63  
64  
65  
66  
67  
68  
69  
70  
71  
72  
73  
74  
75  
76  
77  
78  
79  
80  
81  
82  
83  
84  
85  
86  
87

**Figure S5. Western blot results of proteins related to oxidative stress and apoptosis in heart tissues from obese T2DM mice.** (A) Western blot images of proteins related to oxidative stress and apoptosis in heart tissues from obese T2DM mice. (B) Relative quantification based on the results of panel A. Data are expressed as mean  $\pm$  SD. (\*,  $p < 0.05$ ; \*\*,  $p < 0.01$ ; \*\*\*,  $p < 0.001$ . n = 3 for each group)

**Figure S6. Western blot results of proteins related to oxidative stress and apoptosis in heart tissues from non-obese T2DM mice.** (A) Western blot images of proteins related to oxidative stress and apoptosis in heart tissues from non-obese T2DM mice. (B) Relative quantification based on the results of panel A. Data are expressed as mean  $\pm$  SD. (\*,  $p < 0.05$ ; \*\*,  $p < 0.01$ ; \*\*\*,  $p < 0.001$ . n = 3 for each group)

**Figure S7. The summary picture of the results in T2DM mice.** The summary picture showing the differences of cardiac function and molecular mechanism in hearts of T2DM mice with obesity or non-obesity through the disease course.

**Figure S8. Competency in medical knowledge and translational outlook.** Obese T2DM exhibits more severe and sustained lipotoxicity compared to non-obese T2DM. Non-obese T2DM exhibits a significant decrease in antioxidant capacity in the event of systolic dysfunction compared to obese T2DM. Obese T2DM is more prone to cardiac systolic dysfunction due to different cardiac energy metabolism and oxidative stress adaptations in T2DM with obese and non-obese. Different BMI can be used as a basis for judging energy intervention or antioxidant therapy.

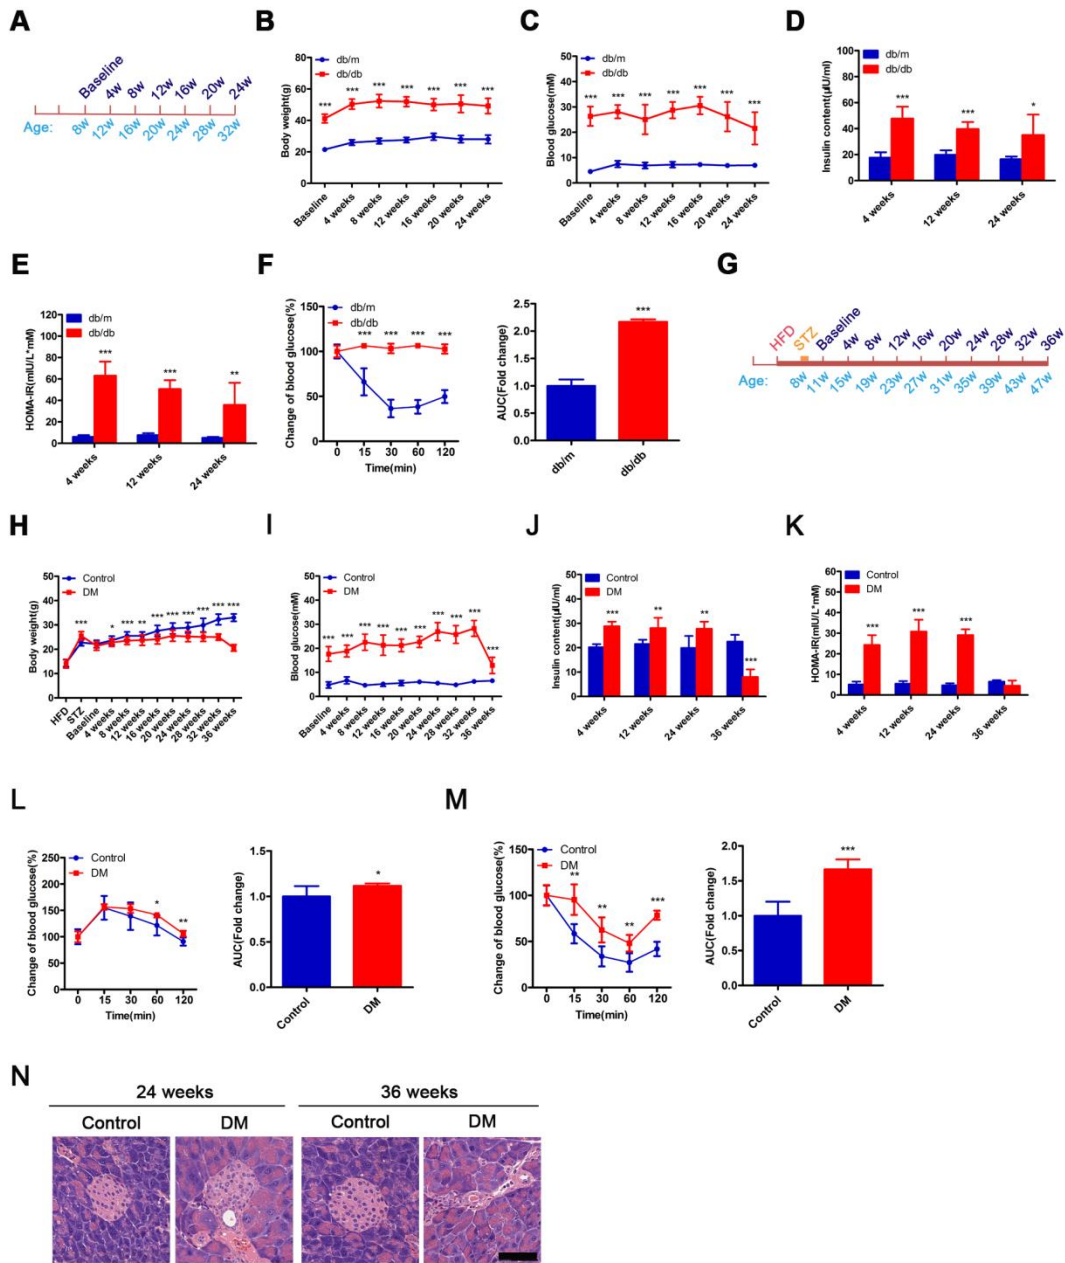

88  
89  
90  
91  
92  
93  
94  
95  
96  
97  
98  
99  
100

Figure S1

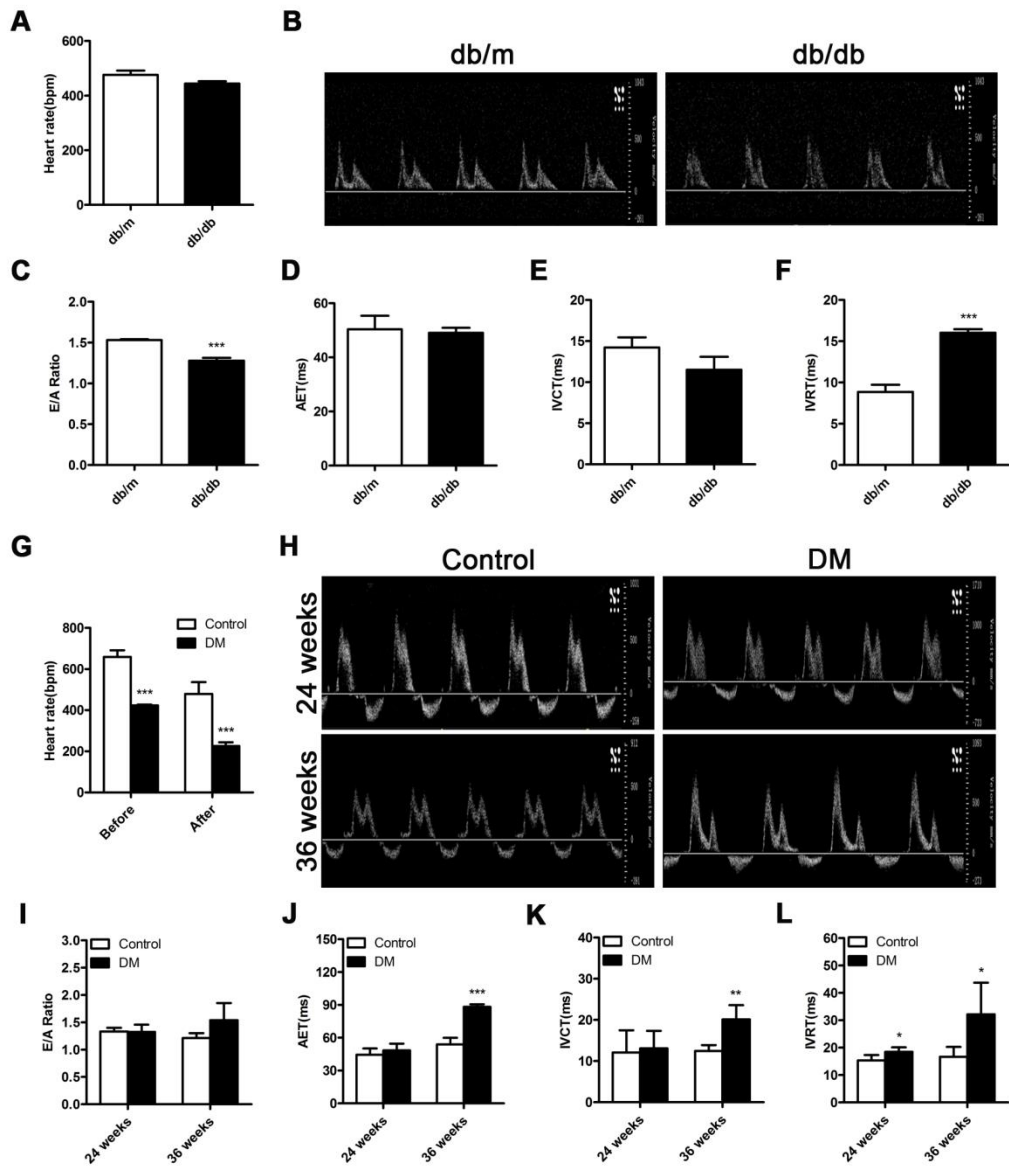

101  
102  
103

Figure S2

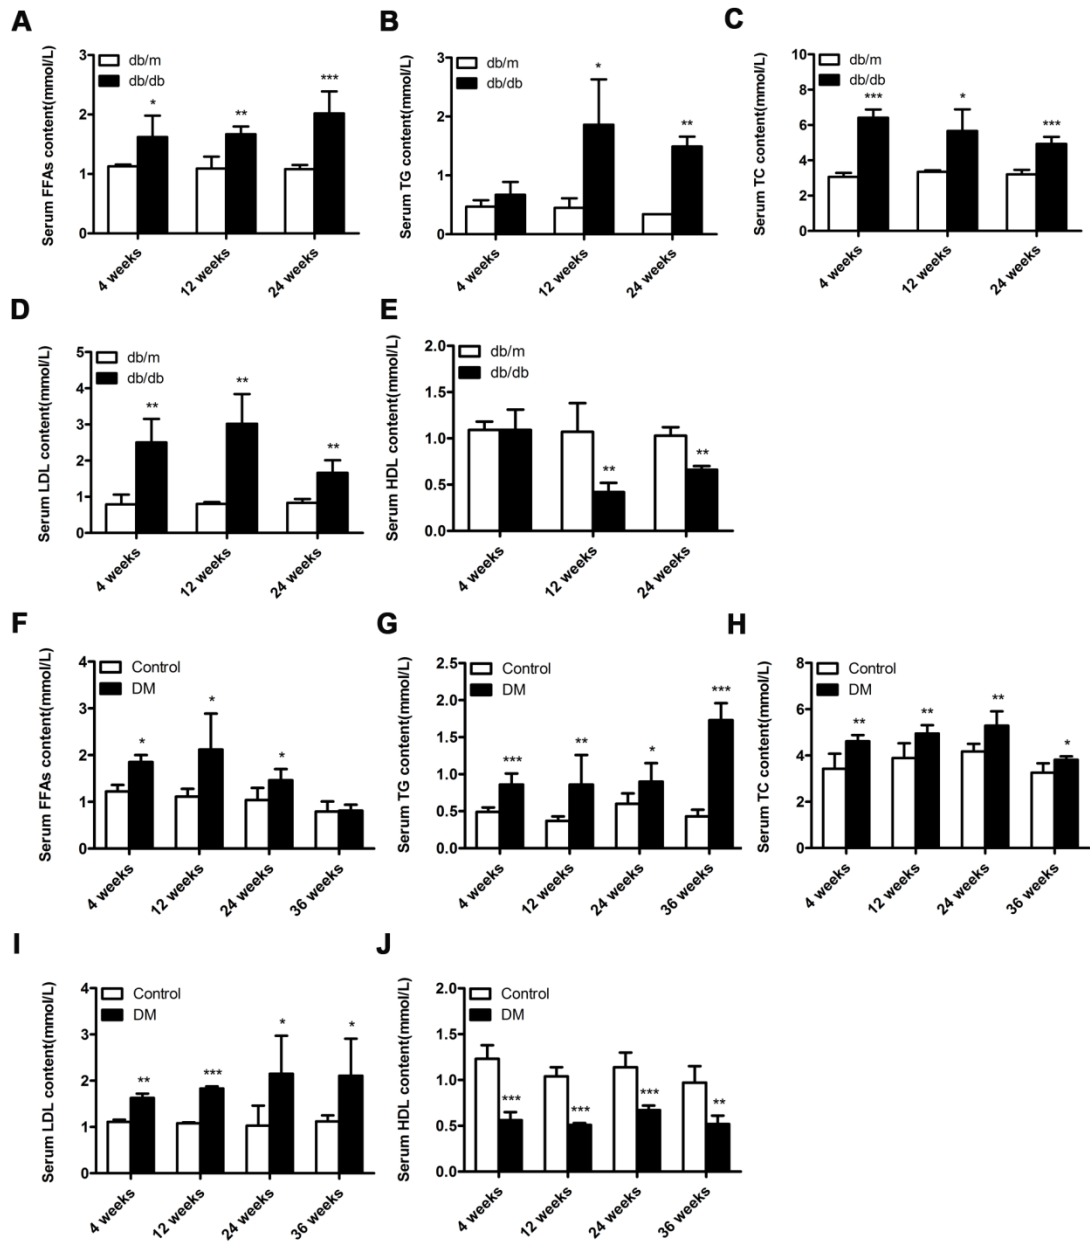

104

105 Figure S3

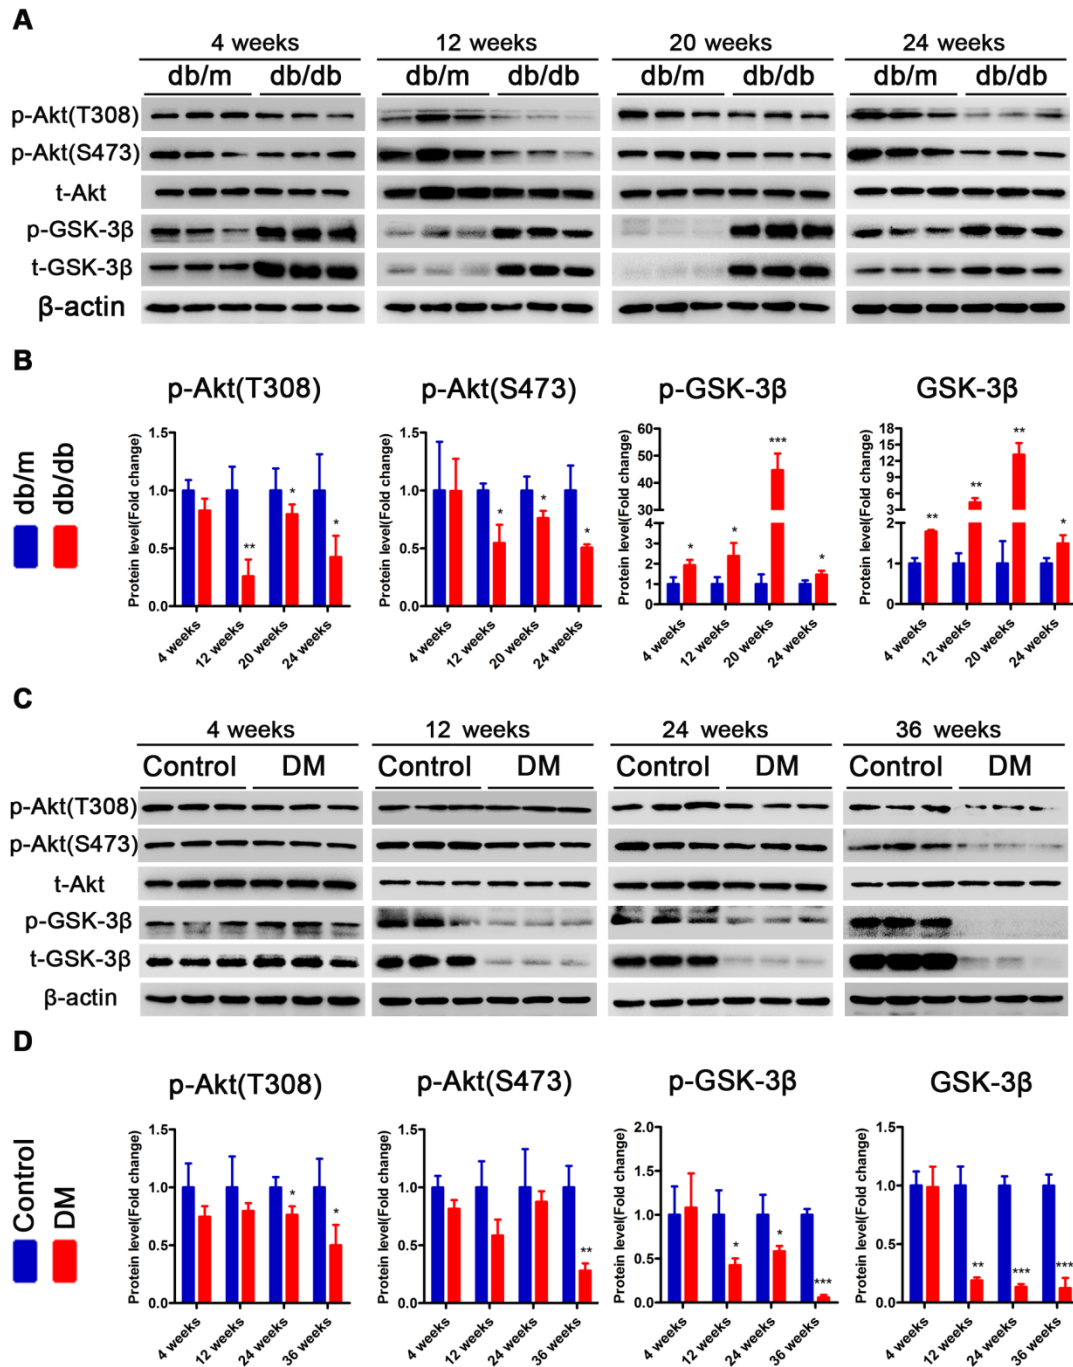

106

107

Figure S4

108

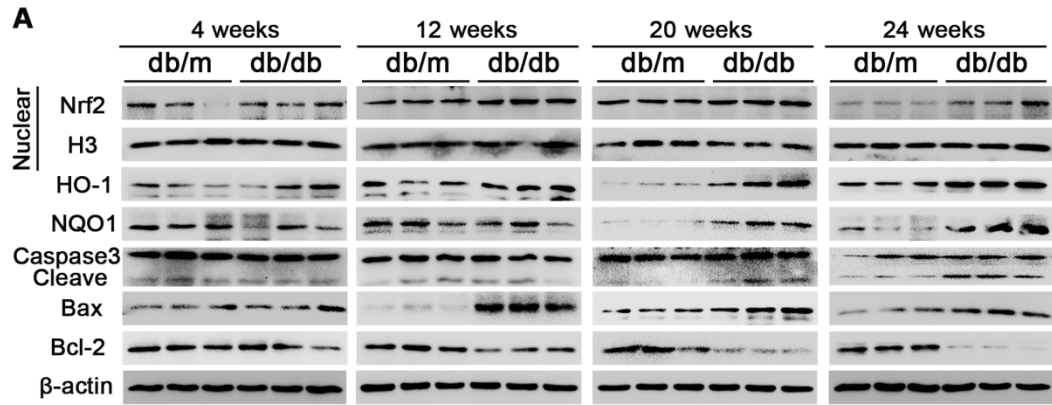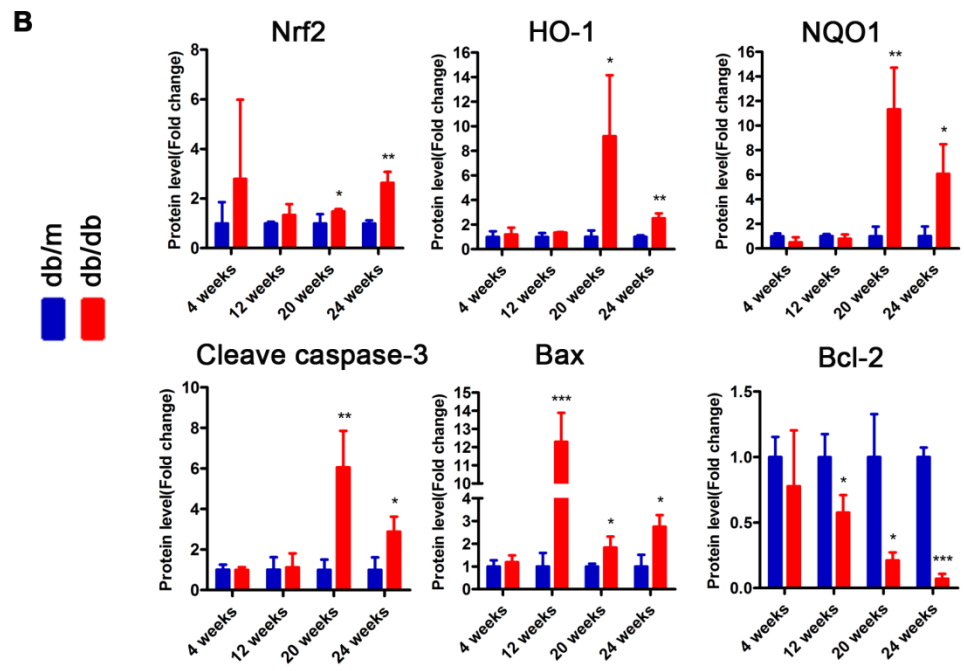

109

110 **Figure S5**

111

112

113

114

115

116

117

118

119

120

121

122

123

124

125

126

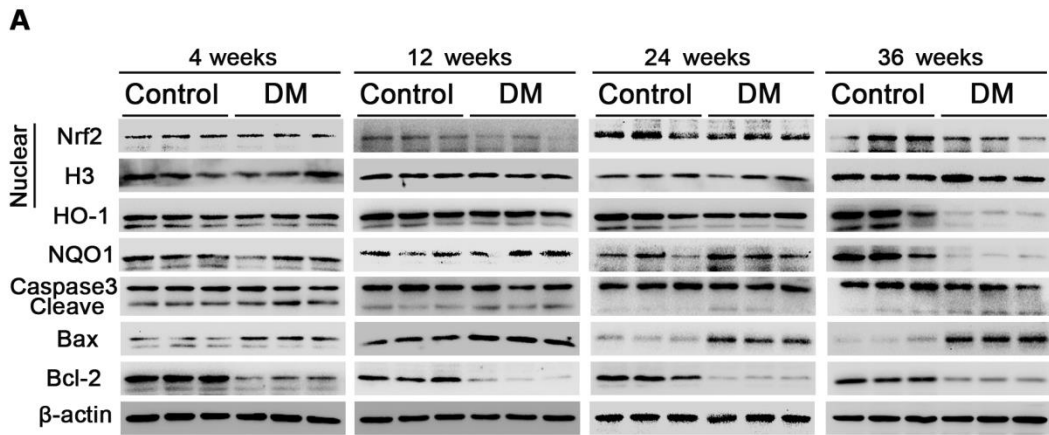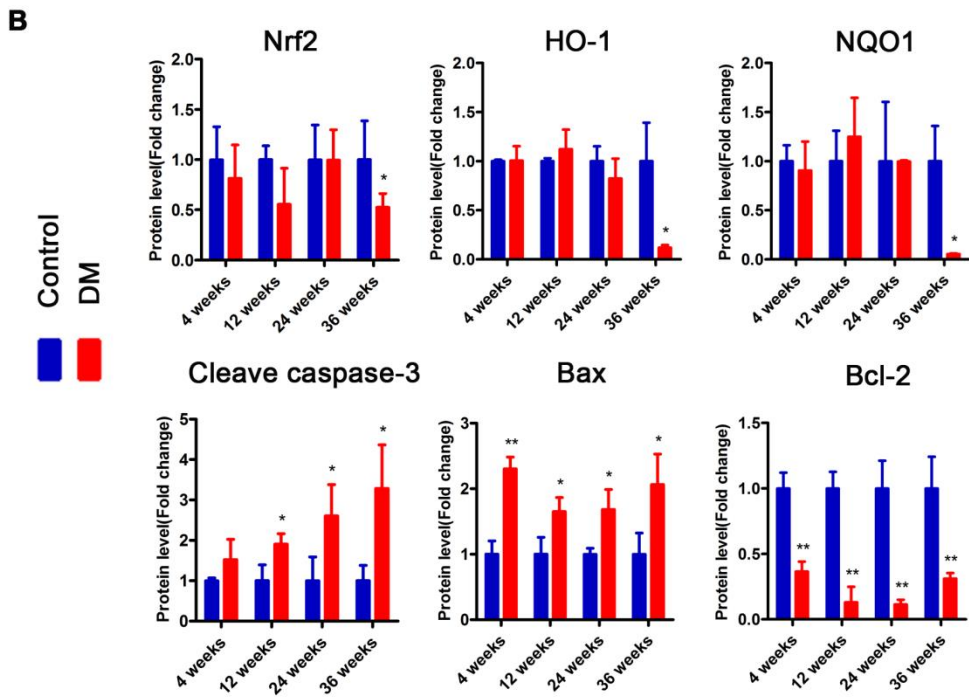

127

128 **Figure S6**

129

130

131

132

133

134

135

136

137

138

139

140

141

142



# Type 2 Diabetes Mellitus

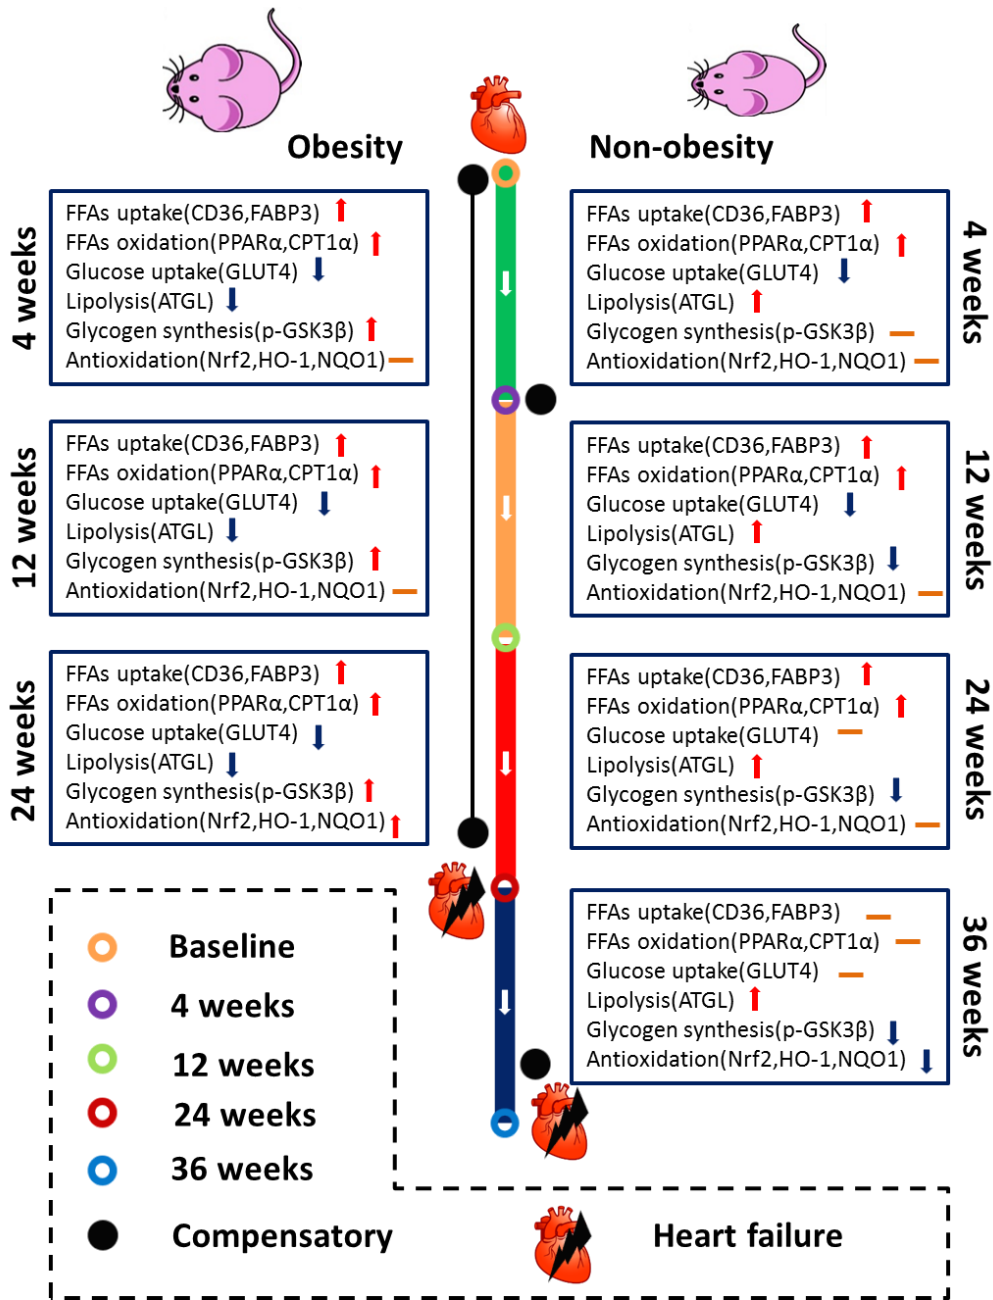

Figure S7

143  
144  
145  
146  
147  
148  
149  
150  
151  
152

# T2DM & DCM

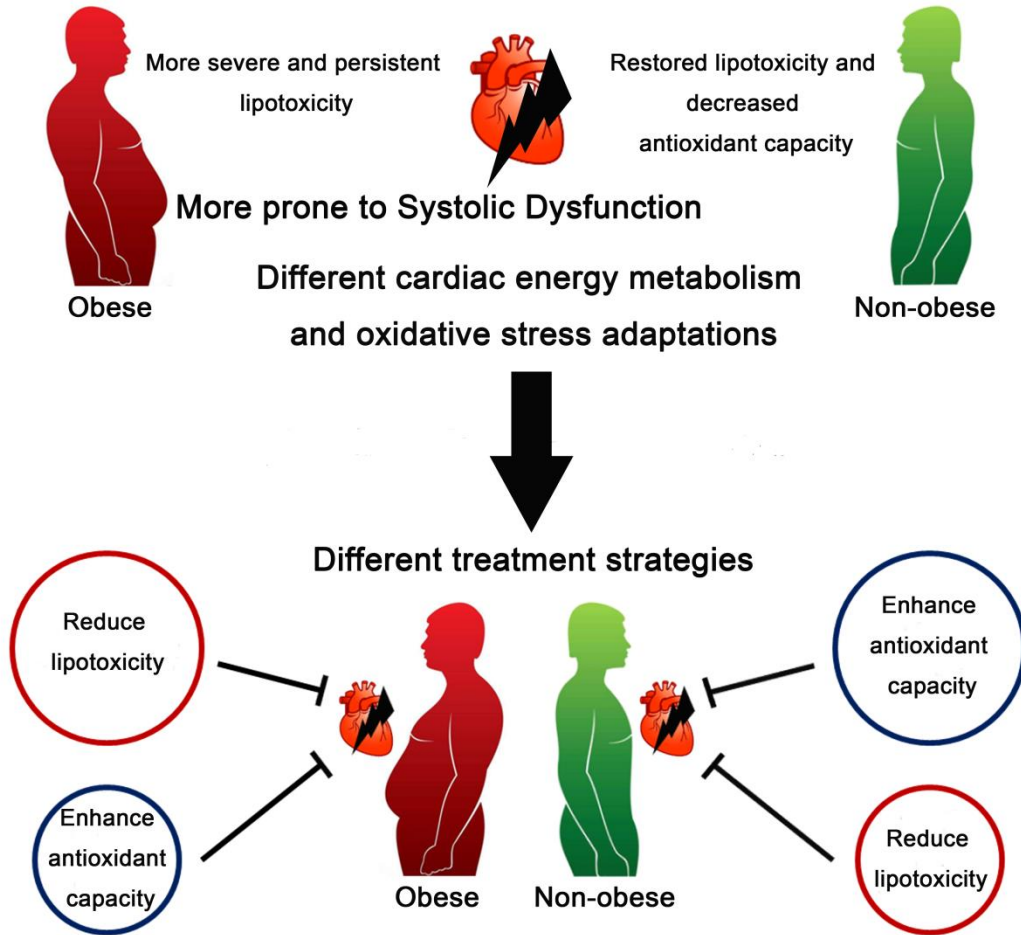

153

154 **Figure S8**

155

156

157

158

159

160

161

162

163

164

165

166

167

168

169

170

171

**Table S1. The information of antibodies.**

| <b>Antibodies</b> | <b>Manufacture and item NO.</b>    | <b>Application</b>    |
|-------------------|------------------------------------|-----------------------|
| CD31              | Abcam(ab28364)                     | Immunofluorescence    |
| PPAR $\alpha$     | Abcam(ab8934)                      | Western blotting      |
| CD36              | Sigma(b104094)                     | Western blotting      |
| FABP3             | Cell signaling technology(14780S)  | Western blotting      |
| FATP4             | Sigma(SAB2102194)                  | Western blotting      |
| CPT1 $\alpha$     | Abcam(ab128568)                    | Western blotting      |
| ATGL              | Cell signaling technology(2439S)   | Western blotting, IHC |
| GLUT4             | Cell signaling technology(2213S)   | Western blotting      |
| p-Akt(T308)       | Cell signaling technology (13038S) | Western blotting      |
| p-Akt(S73)        | Cell signaling technology (4060S)  | Western blotting      |
| Akt               | Cell signaling technology (4691S)  | Western blotting      |
| p-GSK-3 $\beta$   | Cell signaling technology (5558S)  | Western blotting, IHC |
| GSK-3 $\beta$     | Cell signaling technology (12456S) | Western blotting      |
| Nrf2              | Cell signaling technology (12721S) | Western blotting      |
| HO-1              | Cell signaling technology (70081S) | Western blotting, IHC |
| NQO1              | Abcam (ab28947)                    | Western blotting      |
| Histone H3        | Cell signaling technology (4499S)  | Western blotting      |
| (Cleave)Caspase3  | Cell signaling technology (9915T)  | Western blotting      |
| Bax               | Beyotime (AB026)                   | Western blotting      |
| Bcl-2             | Beyotime (AB112)                   | Western blotting      |
| $\beta$ -actin    | Cell signaling technology (3700S)  | Western blotting      |
| FABP3             | Proteintech (10676-1-AP)           | IHC                   |
| CPT-1 $\alpha$    | Proteintech (15184-1-AP)           | IHC                   |
| NQO1              | Proteintech (11451-1-AP)           | IHC                   |

174

**Table S2. Primers for qPCR.**

175

| <b>Genes</b>       | <b>Primers</b>                                                         |
|--------------------|------------------------------------------------------------------------|
| Mouse ANP          | F: 5'-GCTTCCAGGCCATATTGGAGCA-3'<br>R: 5'-TCTCTCAGAGGTGGGTTGACCT-3'     |
| Mouse BNP          | F: 5'-ATGGATCTCCTGAAGGTGCTGT-3'<br>R: 5'-GCAGCTTGAGATATGTGTCACC-3'     |
| Mouse Acadvl       | F: 5'-ATCAGGTGTTCCCATACCCA-3'<br>R: 5'-TCCTTGAGTCCCTGCAAAGT-3'         |
| Mouse Acsl1        | F: 5'-AACGAGGCAAGAAGTGTGGG-3'<br>R: 5'-TGGTGAGTGATCATTGCTCC-3'         |
| Mouse Acadm        | F: 5'-AGGATGACGGAGCAGCCAAT-3'<br>R: 5'-ATCTGGGTTAGAACGTGCCA-3'         |
| Mouse Cpt1 $\beta$ | F: 5'-CGTTCACGCCATGATCATGT-3'<br>R: 5'-AGAGCCAGACCTTGAAGAAG-3'         |
| Mouse Acaa2        | F: 5'-TCAACAGGCTCTGTGGCTCT-3'<br>R: 5'-TGCCCACAAAGTATCTTCC-3'          |
| Mouse Fabp3        | F: 5'-CTGGACGGAGGCAAACATCAT-3'<br>R: 5'-AGGGGAAAACCATGAGGCAG-3'        |
| Mouse CD36         | F: 5'-GATGAGCATAGGACATACTTAGATGTG-3'<br>R: 5'-CACCCTCCAATCCCAAGTAAG-3' |
| Mouse GAPDH        | F: 5'-TGCGACTTCAACAGCAACTC-3'<br>R: 5'-GCCTCTCTGCTCAGTGTC-3'           |

176

177

178

179

180

181

182

183

**Table S3. The information of donors.**

| No. | Type                                                               | Gender | Age<br>(Years) | Abdominal fat<br>thickness(cm) | Heart weight<br>(g) |
|-----|--------------------------------------------------------------------|--------|----------------|--------------------------------|---------------------|
| 1   | T2DM with obesity                                                  | Male   | 43             | 3.5                            | 380                 |
| 2   |                                                                    | Male   | 55             | 3.4                            | 500                 |
| 3   |                                                                    | Female | 68             | 4                              | 350                 |
| 4   |                                                                    | Male   | 49             | 11                             | 700                 |
| 5   |                                                                    | Female | 45             | 3                              | 400                 |
| 6   |                                                                    | Female | 63             | 3                              | 450                 |
| 7   | Healthy population<br>(Control group for<br>T2DM with obesity)     | Male   | 41             | 1.5                            | 350                 |
| 8   |                                                                    | Male   | 55             | 1.5                            | 350                 |
| 9   |                                                                    | Female | 68             | 2.1                            | 300                 |
| 10  |                                                                    | Male   | 51             | 1.2                            | 420                 |
| 11  |                                                                    | Female | 44             | 2.7                            | 300                 |
| 12  |                                                                    | Female | 64             | 1.8                            | 350                 |
| 13  | T2DM with non-obesity                                              | Male   | 64             | 1.5                            | 500                 |
| 14  |                                                                    | Male   | 50             | 1.2                            | 600                 |
| 15  |                                                                    | Female | 68             | 1.4                            | 400                 |
| 16  |                                                                    | Female | 66             | 1                              | 350                 |
| 17  |                                                                    | Male   | 41             | 1                              | 380                 |
| 18  |                                                                    | Male   | 72             | 2                              | 520                 |
| 19  |                                                                    | Male   | 49             | 1.3                            | 300                 |
| 20  |                                                                    | Female | 70             | 2.4                            | 440                 |
| 21  | Healthy population<br>(Control group for T2DM<br>with non-obesity) | Male   | 64             | 2                              | 400                 |
| 10  |                                                                    | Male   | 51             | 1.2                            | 420                 |
| 9   |                                                                    | Female | 68             | 2.1                            | 300                 |
| 12  |                                                                    | Female | 64             | 1.8                            | 350                 |
| 22  |                                                                    | Male   | 41             | 0.8                            | 380                 |
| 23  |                                                                    | Male   | 71             | 1                              | 300                 |
| 24  |                                                                    | Male   | 49             | 2                              | 450                 |
| 25  |                                                                    | Female | 68             | 1.6                            | 300                 |

185

186

187
